# Supplementary material
Source: HighWire-hosted journal article supplement (https://bmjopen.bmj.com/content/12/5/e060510)
Supplement: inline-supplementary-material-1 [file inline-supplementary-material-1.pdf]

## 老年人健康状况、社会融合问卷

尊敬的受访者，您好：

为了解随迁老人健康状况，我们实施了本次问卷调查。本调查收集到的所有数据均为研究所用，绝对保密，不会对您和家人带来任何负面影响。

随迁老人健康状况及干预研究课题组

### 一、随迁老人基本信息

|             |                                                     |         |                                    |            |         |
|-------------|-----------------------------------------------------|---------|------------------------------------|------------|---------|
| 性别          | ①男 ②女                                               | 民族      | ①汉族 ②回族 ③满族 ④其他                    | 年龄         | _____岁  |
| 婚姻状况        | ①有配偶（包括再婚） ②未婚 ③离婚 ④丧偶 ⑤其他                          | 就业状况    | ①在业有收入 ②离退休 ③无业无收入                 | 户口         | ①农村 ②城市 |
| 受教育程度       | ①没上过学 ②小学 1~3 年 ③小学 4~6 年 ④初中 ⑤高中/中专 ⑥大学专科 ⑦大学本科及以上 | 本人月收入   | _____元                             |            |         |
| 随迁年份（哪年来济南） | _____年 _____月                                       | 随迁空间类型  | ①跨区/县 ②跨地级市 ③跨省 ④跨国                |            |         |
| 随迁户口类型      | ①农村-城市 ②城市-城市                                       | 随迁人数    | ①自己一人 ②和老伴共 2 人 ③和其他家人共 2 人 ④共≥3 人 | 已办理居住证/居住证 | ①是 ②否   |
| 随迁意愿        | ①完全不愿意 ②部分不愿意 ③一般 ④部分愿意 ⑤完全愿意                       | 目前随迁子女是 | ①儿子 ②女儿                            |            |         |

### 二、随迁老人社会支持

|                         |               |                     |                |                    |
|-------------------------|---------------|---------------------|----------------|--------------------|
| 您遇到烦恼时的倾诉方式：            | ①从不向任何人诉说     | ②只向关系极为密切的 1—2 个人诉说 | ③如果朋友主动询问您会说出来 | ④主动诉说自己烦恼以获得支持/理解  |
| 您遇到烦恼时的求助方式：            | ①只靠自己，不接受别人帮助 | ②很少请求别人帮助           | ③有时请求别人帮助      | ④有困难时经常向家人、亲友、组织求援 |
| 对于团体（如党、宗教、工会等）组织的活动，您： | ①从不参加         | ②偶尔参加               | ③经常参加          | ④主动参加并积极活动         |

### 三、随迁老人手机使用

|                  |                   |
|------------------|-------------------|
| 是否经常使用微信/支付宝付款？  | ①从不 ②偶尔 ③经常 ④每天使用 |
| 是否经常使用微信与亲朋好友联系？ | ①从不 ②偶尔 ③经常 ④每天使用 |

### 四、随迁老人孤独感

|                     |                 |                     |                 |
|---------------------|-----------------|---------------------|-----------------|
| 1.你常感到缺少伙伴/朋友吗？     | ①从不 ②很少 ③有时 ④一直 | 2.你常感到没人可以信赖吗？      | ①从不 ②很少 ③有时 ④一直 |
| 3.你常感到想要与人来往、结交朋友吗？ | ①从不 ②很少 ③有时 ④一直 | 4.你常感到被人冷落吗？        | ①从不 ②很少 ③有时 ④一直 |
| 5.你常感到与别人隔开了吗？      | ①从不 ②很少 ③有时 ④一直 | 6.你常感到当你愿意时就能找到伙伴吗？ | ①从不 ②很少 ③有时 ④一直 |
| 7.你常感到羞怯吗？          | ①从不 ②很少 ③有时 ④一直 | 8.你常感到有人围着你但并不关心你吗？ | ①从不 ②很少 ③有时 ④一直 |
